# Supplementary material for: Consumer Acceptability, Eye Fixation, and Physiological Responses: A Study of Novel and Familiar Chocolate Packaging Designs Using Eye-Tracking Devices
Source: PubMed Central journal article supplement (PMC6679145; doi:10.3390/foods8070253), 2019-07-12
Supplement: foods-08-00253-s001.pdf [file foods-08-00253-s001.pdf]

**Supplementary Materials:** The following are available online at [www.mdpi.com/xxx/s1](http://www.mdpi.com/xxx/s1),

**Table S1:** Factor loadings from the principal components analysis for the descriptors used in the analysis of Figure 5 and for the first two principal components (PC1 and PC2).

| Descriptor                 | PC 1  | PC 2  |
|----------------------------|-------|-------|
| Image                      | -0.29 | -0.26 |
| Net weight                 | 0.14  | 0.65  |
| Brand name                 | -0.46 | 0.36  |
| COO logo                   | 0.47  | -0.10 |
| Manufacturer's information | 0.44  | 0.27  |
| Ingredients                | 0.50  | -0.17 |
| Back brand name            | -0.03 | 0.50  |

**Table S2:** Factor loadings from the principal components analysis for the descriptors used in the analysis of Figure 6 and for the first two principal components (PC1 and PC2)

| Descriptor         | PC 1  | PC 2  |
|--------------------|-------|-------|
| Neutral            | 0.31  | 0.01  |
| Happy              | 0.26  | -0.05 |
| Sad                | -0.23 | 0.01  |
| Angry              | 0.11  | 0.15  |
| Surprised          | -0.28 | -0.05 |
| Scared             | -0.31 | -0.05 |
| Disgusted          | 0.13  | 0.18  |
| Contempt           | 0.25  | -0.21 |
| Valence            | 0.31  | -0.02 |
| Arousal            | -0.31 | -0.01 |
| Y-Head orientation | -0.23 | -0.19 |
| X-Head orientation | 0.14  | 0.35  |
| Mouth              | 0.01  | -0.31 |
| Left eye           | -0.08 | 0.45  |
| Right eye          | 0.03  | 0.32  |
| Left eyebrow       | 0.31  | -0.05 |
| Right eyebrow      | 0.31  | -0.09 |
| Gaze direction     | 0.12  | -0.34 |

|                     |       |       |
|---------------------|-------|-------|
| Number of fixations | -0.04 | -0.43 |
|---------------------|-------|-------|

**Table S3:** Factor loadings from the principal components analysis for the descriptors used in the analysis of Figure 7 and for the first two principal components (PC1 and PC2)

| Descriptor          | PC 1  | PC 2  |
|---------------------|-------|-------|
| Neutral             | 0.35  | 0.04  |
| Happy               | -0.15 | 0.11  |
| Sad                 | -0.23 | -0.17 |
| Angry               | -0.13 | 0.06  |
| Surprised           | -0.14 | 0.20  |
| Scared              | -0.32 | 0.04  |
| Disgusted           | -0.17 | 0.13  |
| Contempt            | 0.22  | -0.34 |
| Valence             | 0.34  | -0.01 |
| Arousal             | -0.24 | -0.27 |
| Y-Head orientation  | -0.19 | -0.34 |
| X-Head orientation  | -0.11 | 0.37  |
| Z-Head orientation  | 0.21  | -0.02 |
| Mouth               | -0.24 | -0.26 |
| Left eye            | -0.24 | -0.17 |
| Right eye           | -0.12 | 0.39  |
| Left eyebrow        | 0.33  | 0.03  |
| Right eyebrow       | -0.05 | -0.21 |
| Gaze direction      | 0.10  | -0.37 |
| Number of fixations | -0.14 | 0.06  |

**Table S4:** Factor loadings from the principal components analysis for the descriptors used in the analysis of Figure 8 and for the first two principal components (PC1 and PC2)

| Descriptor                    | PC 1  | PC 2  |
|-------------------------------|-------|-------|
| Fix Brand name                | 0.17  | 0.08  |
| Fix COO logo                  | -0.26 | 0.14  |
| Fix Nutritional information   | -0.18 | -0.01 |
| Fix Manufacture's information | -0.25 | -0.19 |
| Fix Bar code                  | -0.17 | -0.09 |

|                     |       |       |
|---------------------|-------|-------|
| Fix Ingredients     | -0.12 | -0.14 |
| Familiarity         | 0.30  | -0.02 |
| Liking              | 0.23  | 0.10  |
| Group-Solo          | -0.25 | -0.20 |
| Reserved-Unreserved | 0.12  | 0.32  |
| Negative-Positive   | 0.26  | 0.11  |
| Calm-Excited        | 0.20  | 0.30  |
| Stimulated-Relaxed  | -0.19 | -0.28 |
| FR Neutral          | -0.03 | 0.21  |
| FR Sad              | 0.10  | -0.25 |
| FR Surprised        | -0.04 | 0.16  |
| FR Disgusted        | 0.19  | -0.16 |
| FR Contempt         | -0.02 | -0.23 |
| FR Valence          | -0.16 | 0.24  |
| FR Arousal          | -0.16 | 0.06  |
| FR Y - Head         | -0.19 | 0.19  |
| FR X - Head         | -0.16 | 0.27  |
| FR Left Eye         | 0.25  | -0.02 |
| FR Left Eyebrow     | -0.23 | 0.26  |
| FR Right Eyebrow    | -0.24 | 0.01  |
| FR Gaze Direction   | 0.15  | -0.29 |
